# Supplementary material
Source: PubMed Central journal article supplement (PMC4569944)

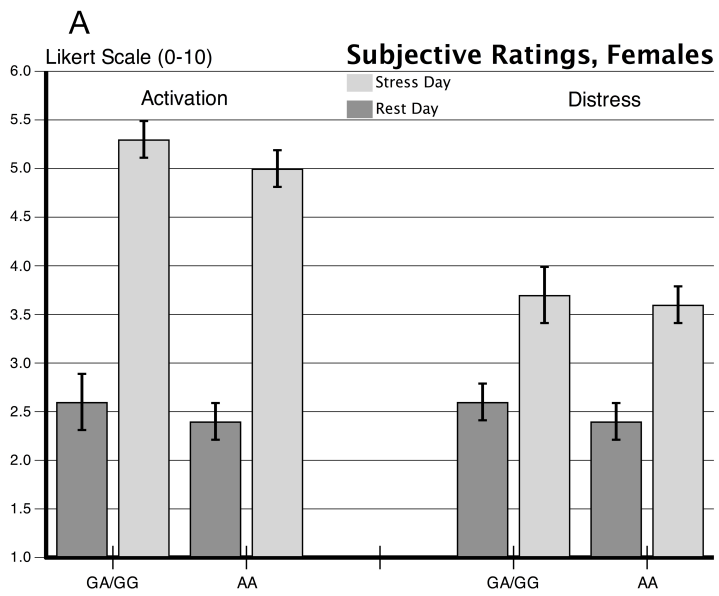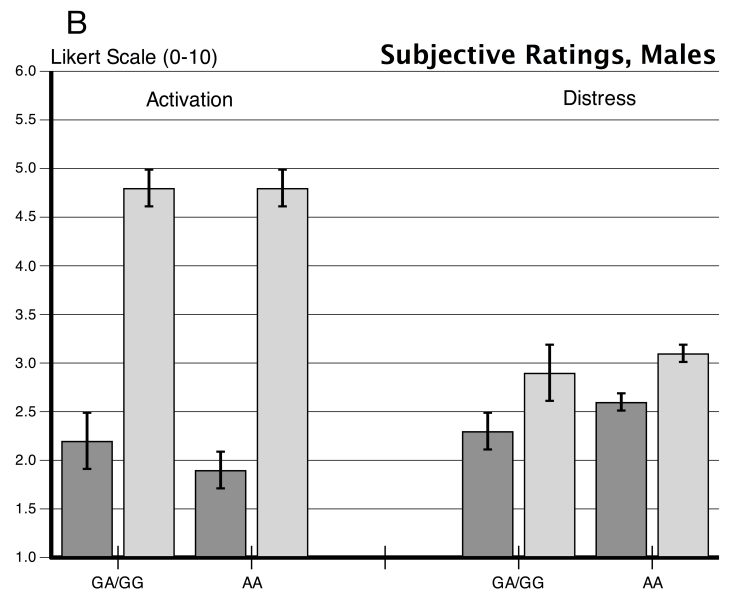

Supplement: npp2015101x3.pdf [file npp2015101x3.pdf]
